# Supplementary material for: A comparative study of the ameliorative effects of hyaluronic acid oligosaccharides and hyaluronic acid on DSS-induced colitis in mice and research on relevant mechanisms
Source: Royal Society of Chemistry journal article supplement (doi:10.1039/d2fo03644d), 2023-01-01
Supplement: d2fo03644d1.pdf [file d2fo03644d1.pdf]

Table S1 Scoring system for calculating a disease activity index

|   | Weight loss (%) | Stool consistency | rectal bleeding    |
|---|-----------------|-------------------|--------------------|
| 0 | None            | Normal            | Negative           |
| 1 | 1-5%            | Mild soft stool   | weakly positive    |
| 2 | 5-10%           | Sever soft stool  | positive           |
| 3 | 10-20%          | Mild diarrhea     | intensely positive |
| 4 | >20%            | Severe diarrhea   | Gross blood        |

Table S2 Score of inflammation-associated histological changes in colon

| score | Inflam-<br>mation | Lesions Depth | Crypt Destruction          | Lesions<br>Width |
|-------|-------------------|---------------|----------------------------|------------------|
| 0     | none              | none          | none                       | 0                |
| 1     | mild              | Submucosa     | 1/3 basal crypt            | 1-25             |
| 2     | Severe            | Muscularis    | 2/3 basal crypt            | 26-50            |
| 3     | -                 | Sera          | Intact epithelium only     | 51-75            |
| 4     | -                 | -             | Total crypt and epithelium | 76-100           |

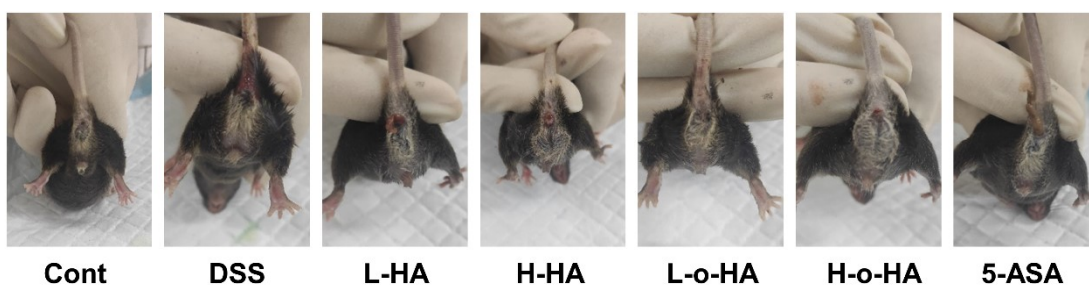

Fig.S1 Representative macroscopic appearances of hematochezia and diarrhea

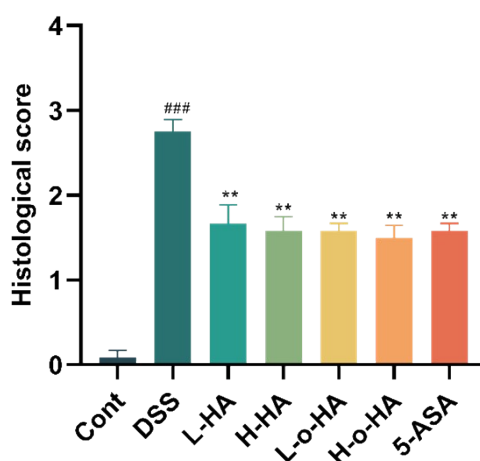

Fig. S2 Histological score

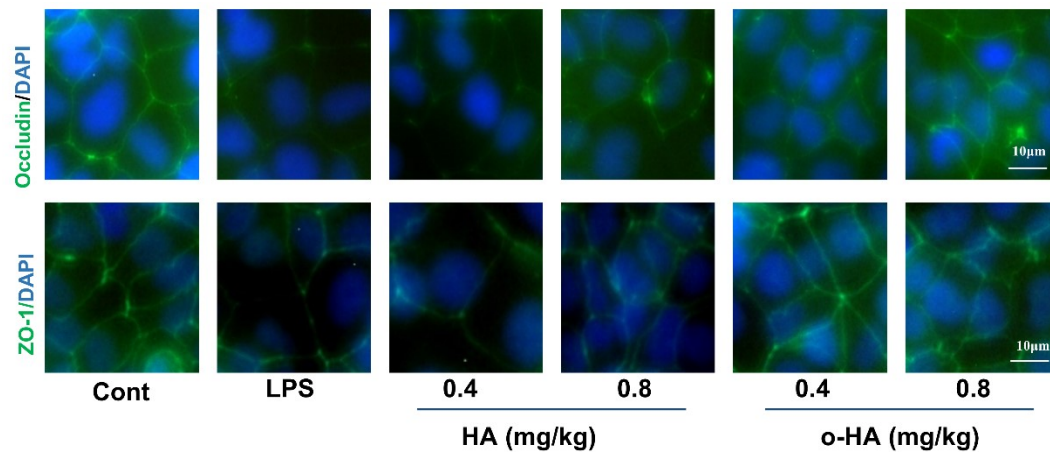

Fig.S3 Expression of ZO-1 and occludin was evaluated by immunofluorescence. The nucleus was stained with DAPI (blue).
